# Supplementary material for: Escherichia coli gene expression is influenced more by gut environmental changes from inflammation and microbiota modulation than by colitis severity
Source: Research Square preprint supplement (doi:10.21203/rs.3.rs-7082467/v1), 2025-07-30
Supplement: Supplementary file 1 [file c31b3b26db1784b9e93888bc.pdf]

## 1 Supplementary Figures

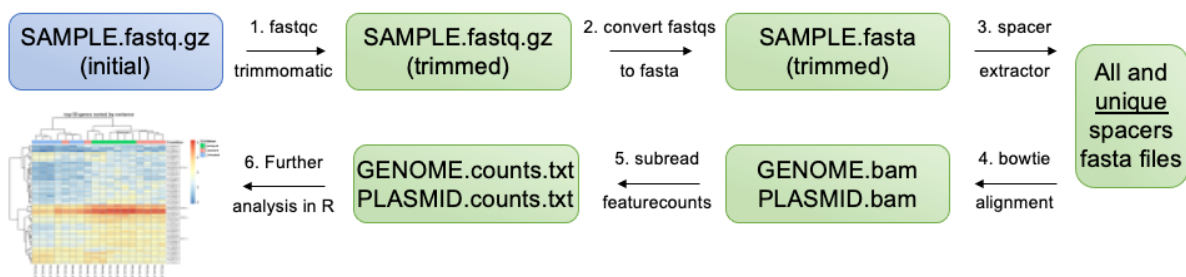

3 Suppl. Fig. 1 Schematic workflow of the computational pipeline.

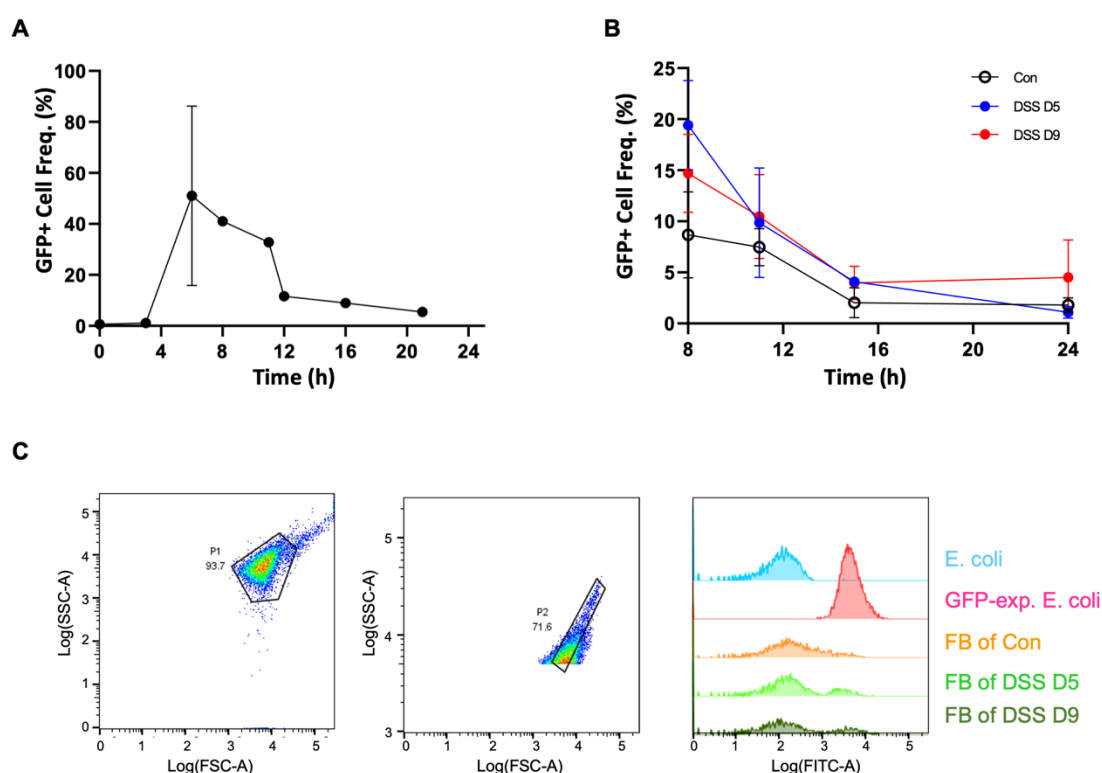

Suppl. Fig. 2 Recovery of *E. coli* from the faeces of mice after oral gavage of *E. coli* expressing green fluorescent protein (GFP). The frequency of *E. coli* expressing GFP in faecal bacteria (FB) from mice that were orally administered *E. coli* was analysed using flow cytometry at the indicated time points.

A. Histogram showing the kinetics of GFP+ *E. coli* in the faeces of normal mice (n=2). B. Plot showing the kinetics of the frequency of GFP+ *E. coli* in the faeces of healthy control mice (Con, n=3) and dss-induced IBD model mice on days 5 (DSS D5, n=3) and 9 (DSS D9, n=3). C. Representative dot plots and histograms after eight hours.

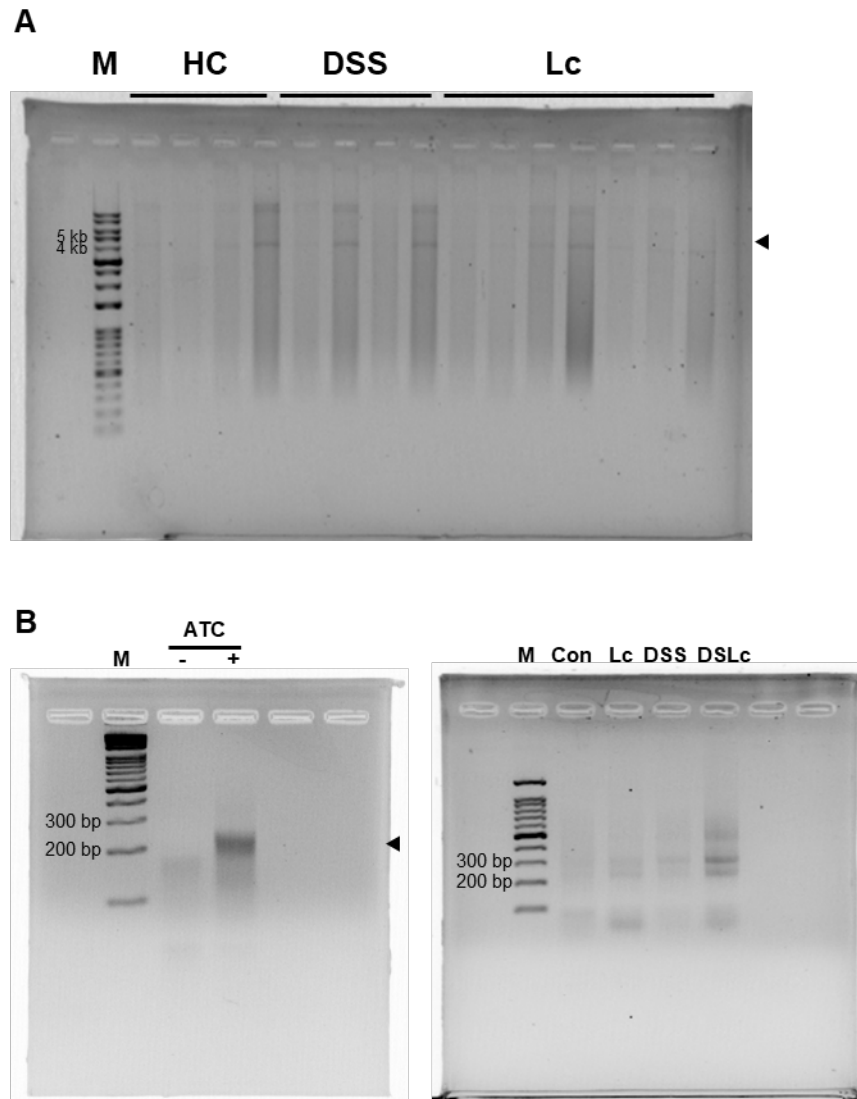

Suppl. Fig. 3 Purification of plasmids and amplification of spacers in plasmids. A. Representative agarose gel image showing the plasmid purified from faeces collected 11 h after oral gavage of mice with reporter *E. coli* transformed with pFs0453\_RT-Cas1\_Cas2. HC: healthy control mice; DSS: dss-induced IBD mouse model. The arrowhead indicates a plasmid of the expected size. B. *In vitro* spacer acquisition (left). *E. coli* transformed with pFs0453\_RT-Cas1\_Cas2 were cultured in the presence of ATC or not, and then the spacers on the purified plasmid were amplified. Representative gel image showing the *in vivo* spacer acquisition (right). The spacers on pFs0453\_RT-Cas1\_Cas2, purified from the faeces of mice in the indicated groups, were amplified as described in the Methods section. PCR products of 210-240 bp and approximately 310 bp indicated the single and double acquisition of a spacer, respectively. Con, control group; Lc, group treated with *Lactobacillus crispatus*; DSS, group treated with dss; DSLc, group treated with dss and gavaged with *L. crispatus*.

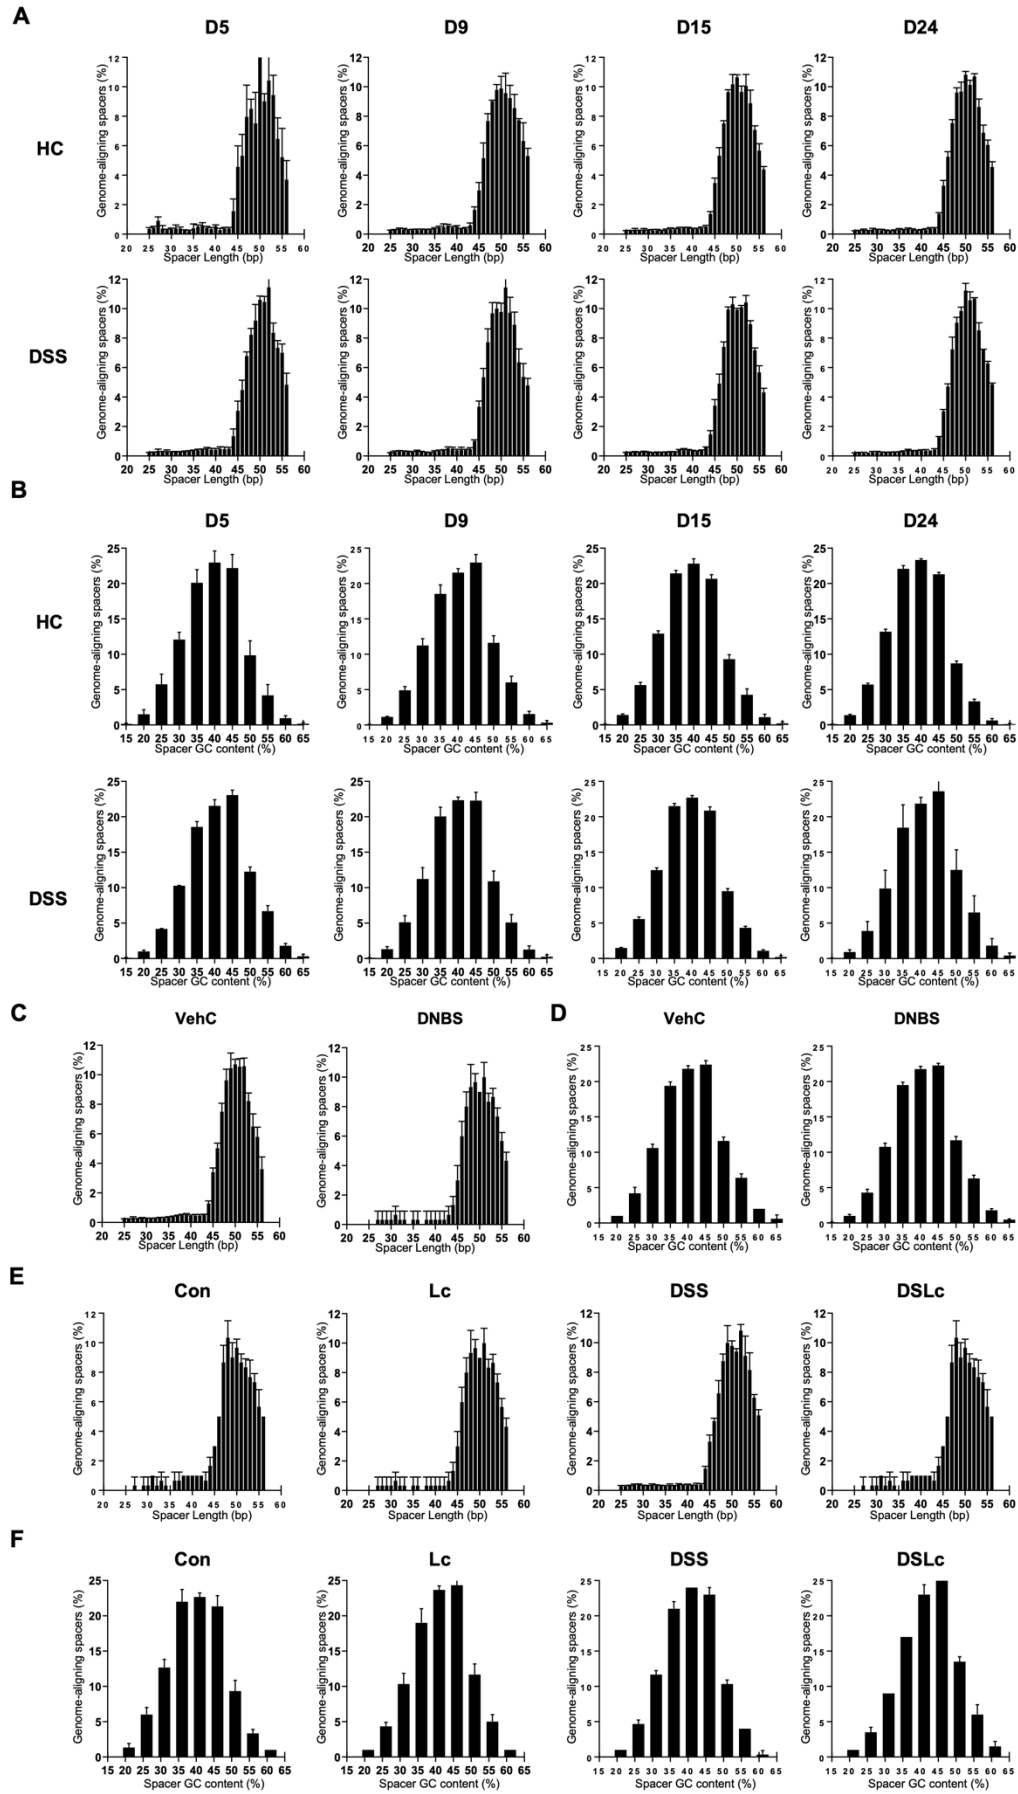

26    Suppl. Fig. 4 Spacer length and GC content distribution. A, C, and E. Spacer length distributions in  
27    samples from the indicated mouse groups. B, D, and F. Distribution of spacer GC content in samples  
28    from the indicated mouse groups. Data represent mean + standard deviation. HC, healthy control  
29    group; DSS, dss-treated group; VehC, vehicle-treated group; DNBS, dnbs-treated group; Con, control  
30    group; Lc, group treated with *L. crispatus*; DSS, group treated with dss; DSLc, group treated with dss  
31    and gavaged with *L. crispatus*.
